# Supplementary material for: Cost-Effectiveness of Risk Score–Stratified Hepatocellular Carcinoma Screening in Patients with Cirrhosis
Source: PubMed Central journal article supplement — Clin Transl Gastroenterol. 2017 Jun 22;8(6):e101–. doi: 10.1038/ctg.2017.26 (PMC5518949; doi:10.1038/ctg.2017.26), 2017-06-22
Supplement: ctg201726x1.pdf [file ctg201726x1.pdf]

## APPENDIX INFORMATION

Goossens N, Singal AG, King LY, et al. Cost-effectiveness of risk score-stratified hepatocellular carcinoma screening in patients with cirrhosis.

Appendix Methods.

Appendix Table 1. Cost of abbreviated full MRI and abbreviated MRI (AMRI).

Appendix Table 2. Estimated cost of HCC risk biomarker test.

Appendix Table 3. Subgroup analysis of cost-effectiveness of risk-stratified screening strategies within high-, intermediate- and low-risk groups.

Appendix Table 4. Cost-effectiveness of HCC screening strategies tested using the EGF-based risk score.

Appendix Table 5. Range and references for HCC incidence according to HCC etiology (Figure 2D main text).

Appendix Table 6. Model variables with references (Table 1 main text).

Appendix Figure 1. Tornado plot for AMRI-AMRI-none compared to US2×-100%.

Appendix Figure 2. Two-way sensitivity analysis of annual HCC incidence vs. HCC low-risk group proportion.

Appendix Figure 3. Two-way sensitivity analysis of AMRI specificity vs. AMRI cost.

## Appendix Methods

### Model and patient population

A previously reported Markov cohort model simulating HCC screening, diagnosis and therapy in a cohort of adult patients with compensated cirrhosis was refined and updated using TreeAge Pro software (TreeAge Software, Williamstown, MA) <sup>1</sup>. We adopted a health system perspective and followed the recommendations of the Panel on Cost-Effectiveness in Health and Medicine <sup>2</sup>.

The baseline population was a cohort of 50-year old subjects with compensated cirrhosis followed up for a period of up to 30 years. Patients entered the model and cycled between principal health states every 6 months to reflect the natural history of cirrhosis with or without HCC (**Figure 1**). Transition probabilities were derived from published literature (**Table 1**). Per-cycle transition probabilities were derived from cumulative probabilities using the declining exponential approximation of life expectancy (DEALE) method <sup>3</sup>.

To estimate the effectiveness of different screening strategies, the model distinguishes between screening-detected and undetected HCC. Depending on the performance of screening modalities, HCC could be detected at an early stage or remain undetected until an advanced stage. Patients with compensated cirrhosis, in whom HCC was detected at an early stage, i.e., within the Milan criteria, were eligible for liver transplantation, resection, or local ablative therapies; whereas patients with decompensated cirrhosis and early-stage HCC were eligible for liver transplantation or local ablative therapies. Patients with advanced tumors received palliative treatments, including chemoembolization, systemic therapy, or best supportive care as recommended by the AASLD guideline <sup>4</sup>.

The following assumptions were made in our model: (1) positive screening tests (i.e., lesions  $\geq 1$  cm in diameter) were evaluated with diagnostic contrast-enhanced MRI; (2) patients with characteristic findings of HCC on the diagnostic MRI did not undergo further diagnostic evaluation prior to treatment; (3) patients with a positive screening test but negative diagnostic MRI underwent biopsy to evaluate the suspicious nodule; (4) patients with false positive screening tests returned to prior screening strategy if biopsy confirmed that no HCC was present; (5) risk of HCC was stable over time during the observation period.

### HCC screening strategies

As the reference strategy, biannual abdominal ultrasound with 100% utilization rate (US2 $\times$ -100%), was used as the current standard of care per practice guidelines, and compared to two non-risk-stratified screening strategies: (1) biannual dynamic contrast-enhanced triple-phase MRI (full MRI) with 100% utilization rate (MRI2 $\times$ -100%); (2) biannual abbreviated contrast-enhanced MRI (AMRI) <sup>5</sup> with 100% utilization rate (AMRI2 $\times$ -100%), and 14 risk-stratified strategies with various combinations of screening modalities assigned for each risk subgroup (**Table 2**). In each of the risk-stratified strategies, patients were first stratified into high-, intermediate-, and low-risk groups by applying either of two published integrative molecular and clinical HCC risk scores elaborated in the next section <sup>6-9</sup>. Subsequently, each risk group was subjected to different screening protocols according to the HCC risk level. The 16 experimental strategies were also compared to another alternative reference strategy, biannual ultrasound with 15% utilization rate (US2 $\times$ -15%), representing the current real-world usage of HCC screening in the U.S. <sup>10</sup>.

## Baseline estimates of clinical parameters

**Table 1** summarizes model parameters, base case values, and plausible ranges based on our previously published model <sup>1</sup>, updated literature review <sup>10</sup>, and expert input for sensitivity analyses. When several estimates were available, we prioritized estimates from meta-analyses and/or larger studies when available.

*Natural history of cirrhosis:* The adjusted annual excess mortality of compensated cirrhosis was estimated as 4%, and 5% of compensated cirrhosis progress to decompensated cirrhosis each year based on a systematic review of 118 studies <sup>11</sup>. As in the prior model, mortality rates were adjusted to avoid double counting HCC-related mortality <sup>1</sup>.

*Risk-stratification strategies and HCC incidence:* A 186-gene signature-based HCC risk score, comprised of the liver gene signature, bilirubin, and platelet count, was used as the example of biomarker-based risk stratification in our base model <sup>8,12</sup>. With the score, proportions of high-, intermediate-, and low-risk groups were 36%, 37%, and 27%, respectively. The baseline annual HCC incidence for the entire cohort, HCC high-, intermediate-, and low-risk groups were 2.9%, 4.9%, 3.3%, and 0.8%, respectively, based on a prospective-retrospective cohort study of HCV-infected compensated cirrhosis patients followed up for up to 23 years <sup>8</sup>. As an additional example, another HCC risk score based on epidermal growth factor (EGF) SNP, which can be measured using buccal swab, was also tested <sup>6</sup>. The score comprises the EGF SNP, age, sex, smoking status, alkaline phosphatase level, and platelet count. With the use of the EGF-based score, proportions of HCC high-, intermediate-, and low-risk groups were 14%, 29%, 57%, respectively. The annual HCC incidence for the entire cohort, HCC high-, intermediate-, and low-risk groups were 1.4%, 5.0%, 1.8%, and 0.4%, respectively, based on a secondary analysis of the HALT-C Trial cohort <sup>6</sup>. Range of annual HCC incidences tested was 0.5% to 7.0%, covering HCC incidence in global populations with a variety of liver disease etiologies <sup>13-20</sup>.

*Progression of HCC:* Rate of annual progression from small to advanced HCC was 40% and annual mortality of advanced HCC was 75% <sup>21,22</sup>. Tumor growth was assumed to be linear, with a doubling time between 117 and 195 days, resulting in approximately 40% of tumors progressing from early to advanced stage each year if not treated <sup>10</sup>.

*HCC screening test performance:* Sensitivity and specificity of screening ultrasound to detect HCC at an early stage were estimated as 63% and 91%, respectively, based on a meta-analysis of ultrasound performance characteristics <sup>23-26</sup>. Sensitivity and specificity of screening full MRI were estimated as 96 and 94%, respectively, based a cohort study of 638 consecutive patients <sup>27</sup>. Sensitivity and specificity of AMRI were estimated as 83 and 93%, respectively, based on a cohort study of 298 consecutive patients <sup>5</sup>. Patients who did not undergo screening were assumed to have a 30% likelihood of being detected at an early stage incidentally using data from a systematic review of HCC screening studies <sup>10</sup>. Diagnostic MRI had sensitivity and specificity of 88% and 94%, respectively, based on previous cohort and case-control studies <sup>25,26,28-31</sup>. Biopsy was assumed to have sensitivity of 62% based on prior cohort studies and specificity of 100% based on expert opinion <sup>32</sup>.

*HCC treatment and prognosis:* Based on data from a meta-analysis of HCC treatment utilization, we estimated the probabilities of any treatment in compensated and decompensated

cirrhosis patients were 69% and 30%, respectively<sup>33 34</sup>. The proportions of treatment-eligible patients with compensated cirrhosis and early HCC undergoing resection, transplantation, and local ablation were 40%, 20%, and 40%, respectively, based on population studies<sup>34 35</sup>. Treatment-eligible patients with decompensated cirrhosis and early HCC were treated with liver transplantation in 40% of cases<sup>1</sup>. Five-year survival rates after surgical resection, liver transplantation, and local ablation were 44%, 70%, and 46%, and perioperative mortality of resection, transplantation, and local ablation were 3.9%, 4.3%, and 0.3%, respectively, based on several large cohort studies<sup>36-48</sup>. These estimates were widely varied in sensitivity analyses to evaluate robustness of the model outputs (**Table 1**).

*Costs and utility:* Costs of screening tests were calculated based on 2015 Medicare Current Procedural Terminology (CPT) reimbursement global costs. The cost of AMRI was conservatively estimated by halving the technical cost of full MRI<sup>49</sup> (**Appendix Table 1**). Cost of the HCC risk biomarker test was calculated as median of multi-gene gapfill CPT codes in Clinical Laboratory Fee Schedule (CLFS) (**Appendix Table 2**). Other direct medical costs were derived from Medicare CPT reimbursement, Nationwide Inpatient Sample, and published literature<sup>50-52</sup> and adjusted for inflation to 2014 costs using the Consumer Price Index inflation calculator from the U.S. Bureau of Labor Statistics (Labor UDo, CPI Inflation Calculator, [www.bls.gov/data/inflation\\_calculator.htm](http://www.bls.gov/data/inflation_calculator.htm), accessed May, 2016). Literature-based estimates were used for the quality-of-life weights<sup>1</sup>.

### **Study outcomes**

Model outcomes included lifetime costs, quality-adjusted life expectancy (QALE), and incremental cost-effectiveness ratios (ICER), defined as incremental cost in U.S.\$ per quality-adjusted life year (QALY) gained. An ICER of less than \$50,000 was regarded as cost-effective. One-way sensitivity analyses were performed on all transition probabilities, costs, and utilities to identify influential variables on cost-effectiveness. Two-way sensitivity analyses were performed for annual HCC incidence and variables found to affect cost-effectiveness in one-way sensitivity analyses. Subgroup analyses were performed for a subset of subjects who were diagnosed for HCC as well as for each HCC risk group. A hypothetical cohort of 10,000 patients was simulated by Monte-Carlo simulation. Validity of the model was assessed by comparing overall survival rates in the entire cohort and HCC-developing patients derived from the model with those in published systematic reviews. All other statistical analyses were performed using the R statistical package ([www.r-project.org](http://www.r-project.org)).

## References

1. Andersson KL, Salomon JA, Goldie SJ, et al. Cost effectiveness of alternative surveillance strategies for hepatocellular carcinoma in patients with cirrhosis. *Clin Gastroenterol Hepatol* 2008;6(12):1418-24. doi: 10.1016/j.cgh.2008.08.005
2. Siegel JE, Weinstein MC, Russell LB, et al. Recommendations for reporting cost-effectiveness analyses. Panel on Cost-Effectiveness in Health and Medicine. *JAMA* 1996;276(16):1339-41.
3. Beck JR, Kassirer JP, Pauker SG. A convenient approximation of life expectancy (the "DEALE"): I. Validation of the method. *The American journal of medicine* 1982;73(6):883-88.
4. Bruix J, Sherman M. Management of hepatocellular carcinoma: an update. *Hepatology* 2011;53(3):1020-2. doi: 10.1002/hep.24199 [published Online First: 2011/03/05]
5. Marks RM, Ryan A, Heba ER, et al. Diagnostic Per-Patient Accuracy of an Abbreviated Hepatobiliary Phase Gadoteric Acid-Enhanced MRI for Hepatocellular Carcinoma Surveillance. *American Journal of Roentgenology* 2015;204(3):527-35.
6. Abu Dayyeh BK, Yang M, Fuchs BC, et al. A functional polymorphism in the epidermal growth factor gene is associated with risk for hepatocellular carcinoma. *Gastroenterology* 2011;141(1):141-9. doi: 10.1053/j.gastro.2011.03.045 [published Online First: 2011/03/29]
7. King LY, Canasto-Chibuque C, Johnson KB, et al. A genomic and clinical prognostic index for hepatitis C-related early-stage cirrhosis that predicts clinical deterioration. *Gut* 2014 doi: 10.1136/gutjnl-2014-307862 [published Online First: 2014/08/22]
8. Hoshida Y, Villanueva A, Sangiovanni A, et al. Prognostic gene expression signature for patients with hepatitis C-related early-stage cirrhosis. *Gastroenterology* 2013;144(5):1024-30. doi: 10.1053/j.gastro.2013.01.021  
S0016-5085(13)00078-4 [pii] [published Online First: 2013/01/22]
9. Hoshida Y, Villanueva A, Kobayashi M, et al. Gene expression in fixed tissues and outcome in hepatocellular carcinoma. *N Engl J Med* 2008;359(19):1995-2004. doi: 10.1056/NEJMoa0804525  
NEJMoa0804525 [pii] [published Online First: 2008/10/17]
10. Singal AG, Pillai A, Tiro J. Early detection, curative treatment, and survival rates for hepatocellular carcinoma surveillance in patients with cirrhosis: a meta-analysis. *PLoS Med* 2014;11(4):e1001624. doi: 10.1371/journal.pmed.1001624
11. D'Amico G, Garcia-Tsao G, Pagliaro L. Natural history and prognostic indicators of survival in cirrhosis: a systematic review of 118 studies. *J Hepatol* 2006;44(1):217-31.
12. King LY, Canasto-Chibuque C, Johnson KB, et al. A genomic and clinical prognostic index for hepatitis C-related early-stage cirrhosis that predicts clinical deterioration. *Gut* 2015;64(8):1296-302. doi: 10.1136/gutjnl-2014-307862
13. Morgan RL, Baack B, Smith BD, et al. Eradication of hepatitis C virus infection and the development of hepatocellular carcinoma: a meta-analysis of observational studies. *Ann Intern Med* 2013;158(5 Pt 1):329-37. doi: 10.7326/0003-4819-158-5-201303050-00005 [published Online First: 2013/03/06]
14. Ascha MS, Hanouneh IA, Lopez R, et al. The incidence and risk factors of hepatocellular carcinoma in patients with nonalcoholic steatohepatitis. *Hepatology* 2010;51(6):1972-78.
15. Sanyal AJ, Banas C, Sargeant C, et al. Similarities and differences in outcomes of cirrhosis due to nonalcoholic steatohepatitis and hepatitis C. *Hepatology* 2006;43(4):682-89.
16. Bhala N, Angulo P, van der Poorten D, et al. The natural history of nonalcoholic fatty liver disease with advanced fibrosis or cirrhosis: An international collaborative study. *Hepatology* 2011;54(4):1208-16. doi: 10.1002/hep.24491
17. Tanaka H, Imai Y, Hiramatsu N, et al. Declining incidence of hepatocellular carcinoma in Osaka, Japan, from 1990 to 2003. *Annals of internal medicine* 2008;148(11):820-26.
18. Tsukuma H, Hiyama T, Tanaka S, et al. Risk factors for hepatocellular carcinoma among patients with chronic liver disease. *New England journal of medicine* 1993;328(25):1797-801.
19. Fattovich G, Stroffolini T, Zagni I, et al. Hepatocellular carcinoma in cirrhosis: incidence and risk factors. *Gastroenterology* 2004;127(5 Suppl 1):S35-50.

20. Mancebo A, González-Diéguez ML, Cadahía V, et al. Annual Incidence of Hepatocellular Carcinoma Among Patients With Alcoholic Cirrhosis and Identification of Risk Groups. *Clinical Gastroenterology and Hepatology* 2013;11(1):95-101. doi: 10.1016/j.cgh.2012.09.007
21. Simonetti R, Liberati A, Angiolini C, et al. Treatment of hepatocellular carcinoma: a systematic review of randomized controlled trials. *Annals of Oncology* 1997;8(2):117-36.
22. Nowak AK, Chow PK, Findlay M. Systemic therapy for advanced hepatocellular carcinoma: a review. *European Journal of Cancer* 2004;40(10):1474-84.
23. Singal A, Volk ML, Waljee A, et al. Meta-analysis: surveillance with ultrasound for early-stage hepatocellular carcinoma in patients with cirrhosis. *Aliment Pharmacol Ther* 2009;30(1):37-47. doi: 10.1111/j.1365-2036.2009.04014.x
24. Singal AG, Li X, Tiro J, et al. Racial, social, and clinical determinants of hepatocellular carcinoma surveillance. *The American journal of medicine* 2015;128(1):90. e1-90. e7.
25. Chou R, Cuevas C, Fu R, et al. Imaging techniques for the diagnosis of hepatocellular carcinoma: a systematic review and meta-analysis. *Annals of internal medicine* 2015;162(10):697-711.
26. Colli A, Fraquelli M, Casazza G, et al. Accuracy of ultrasonography, spiral CT, magnetic resonance, and alpha-fetoprotein in diagnosing hepatocellular carcinoma: a systematic review. *Am J Gastroenterol* 2006;101(3):513-23. doi: 10.1111/j.1572-0241.2006.00467.x
27. Yu NC, Chaudhari V, Raman SS, et al. CT and MRI improve detection of hepatocellular carcinoma, compared with ultrasound alone, in patients with cirrhosis. *Clin Gastroenterol Hepatol* 2011;9(2):161-7. doi: 10.1016/j.cgh.2010.09.017
28. Leoni S, Piscaglia F, Golfieri R, et al. The impact of vascular and nonvascular findings on the noninvasive diagnosis of small hepatocellular carcinoma based on the EASL and AASLD criteria. *Am J Gastroenterol* 2010;105(3):599-609. doi: 10.1038/ajg.2009.654
29. Sangiovanni A, Manini MA, Iavarone M, et al. The diagnostic and economic impact of contrast imaging techniques in the diagnosis of small hepatocellular carcinoma in cirrhosis. *Gut* 2010;59(5):638-44. doi: 10.1136/gut.2009.187286
30. Lee YJ, Lee JM, Lee JS, et al. Hepatocellular carcinoma: diagnostic performance of multidetector CT and MR imaging—a systematic review and meta-analysis. *Radiology* 2015;275(1):97-109.
31. Hanna RF, Miloushev VZ, Tang A, et al. Comparative 13-year meta-analysis of the sensitivity and positive predictive value of ultrasound, CT, and MRI for detecting hepatocellular carcinoma. *Abdominal Radiology* 2015:1-20.
32. Forner A, Vilana R, Ayuso C, et al. Diagnosis of hepatic nodules 20 mm or smaller in cirrhosis: Prospective validation of the noninvasive diagnostic criteria for hepatocellular carcinoma. *Hepatology* 2008;47(1):97-104.
33. Tan D, Yopp A, Beg M, et al. Meta- analysis: underutilisation and disparities of treatment among patients with hepatocellular carcinoma in the United States. *Alimentary pharmacology & therapeutics* 2013;38(7):703-12.
34. Kanwal F, Befeler A, Chari RS, et al. Potentially curative treatment in patients with hepatocellular cancer--results from the liver cancer research network. *Aliment Pharmacol Ther* 2012;36(3):257-65. doi: 10.1111/j.1365-2036.2012.05174.x
35. El-Serag HB, Siegel AB, Davila JA, et al. Treatment and outcomes of treating of hepatocellular carcinoma among Medicare recipients in the United States: a population-based study. *J Hepatol* 2006;44(1):158-66. doi: 10.1016/j.jhep.2005.10.002
36. Llovet JM, Fuster J, Bruix J. Intention- to- treat analysis of surgical treatment for early hepatocellular carcinoma: Resection versus transplantation. *Hepatology* 1999;30(6):1434-40.
37. Fong Y, Sun RL, Jarnagin W, et al. An analysis of 412 cases of hepatocellular carcinoma at a Western center. *Annals of surgery* 1999;229(6):790.
38. Poon RT-P, Fan ST, Lo CM, et al. Long-term survival and pattern of recurrence after resection of small hepatocellular carcinoma in patients with preserved liver function: implications for a strategy of salvage transplantation. *Annals of surgery* 2002;235(3):373.

39. Franco D, Capussotti L, Smadja C, et al. Resection of hepatocellular carcinomas. *Gastroenterology* 1990;98(3):733-38.
40. Mazzaferro V, Regalia E, Doci R, et al. Liver transplantation for the treatment of small hepatocellular carcinomas in patients with cirrhosis. *N Engl J Med* 1996;334(11):693-9.
41. Yao FY, Ferrell L, Bass NM, et al. Liver transplantation for hepatocellular carcinoma: expansion of the tumor size limits does not adversely impact survival. *Hepatology* 2001;33(6):1394-403. doi: 10.1053/jhep.2001.24563
42. Lim KC, Chow PH, Allen J, et al. Systematic review of outcomes of liver resection for early hepatocellular carcinoma within the Milan criteria. *British Journal of Surgery* 2012;99(12):1622-29.
43. Lencioni R, Cioni D, Crocetti L, et al. Early-stage hepatocellular carcinoma in patients with cirrhosis: long-term results of percutaneous image-guided radiofrequency ablation. *Radiology* 2005;234(3):961-7. doi: 10.1148/radiol.2343040350
44. Shiina S, Tateishi R, Arano T, et al. Radiofrequency ablation for hepatocellular carcinoma: 10-year outcome and prognostic factors. *Am J Gastroenterol* 2012;107(4):569-77; quiz 78. doi: 10.1038/ajg.2011.425
45. Tiong L, Maddern G. Systematic review and meta- analysis of survival and disease recurrence after radiofrequency ablation for hepatocellular carcinoma. *British Journal of Surgery* 2011;98(9):1210-24.
46. Tateishi R, Shiina S, Teratani T, et al. Percutaneous radiofrequency ablation for hepatocellular carcinoma. *Cancer* 2005;103(6):1201-09.
47. Dhir M, Lyden ER, Smith LM, et al. Comparison of outcomes of transplantation and resection in patients with early hepatocellular carcinoma: a meta-analysis. *HPB : the official journal of the International Hepato Pancreato Biliary Association* 2012;14(9):635-45. doi: 10.1111/j.1477-2574.2012.00500.x
48. Livraghi T, Solbiati L, Meloni MF, et al. Treatment of focal liver tumors with percutaneous radiofrequency ablation: complications encountered in a multicenter study. *Radiology* 2003;226(2):441-51. doi: 10.1148/radiol.2262012198
49. Besa C, Lewis S, Pandharipande PV, et al. Hepatocellular carcinoma detection: diagnostic performance of a simulated abbreviated MRI protocol combining diffusion-weighted and T1-weighted imaging at the delayed phase post gadoteric acid *Abdom Radiol* 2016 (in press)
50. Sarasin FP, Giostra E, Hadengue A. Cost-effectiveness of screening for detection of small hepatocellular carcinoma in western patients with Child-Pugh class A cirrhosis. *The American journal of medicine* 1996;101(4):422-34.
51. Bennett WG, Inoue Y, Beck JR, et al. Estimates of the cost-effectiveness of a single course of interferon- $\alpha$ 2b in patients with histologically mild chronic hepatitis C. *Annals of internal medicine* 1997;127(10):855-65.
52. Younossi ZM, Singer ME, McHutchison JG, et al. Cost effectiveness of interferon alpha2b combined with ribavirin for the treatment of chronic hepatitis C. *Hepatology* 1999;30(5):1318-24. doi: 10.1002/hep.510300518

**Appendix Table 1**  
**Cost of abbreviated full MRI and abbreviated MRI (AMRI).**

|                        | Full<br>(CPT 74182) | MRI | AMRI     |
|------------------------|---------------------|-----|----------|
| Technical Component    | \$429.73            |     | 214.87*  |
| Professional component | \$98.11             |     | \$98.11  |
| Total cost             | \$527.84            |     | \$312.98 |

Based on Medicare 2015 reimbursement costs.

\*Halved technical cost for standard MRI.

MRI, magnetic resonance imaging; AMRI: abbreviated MRI.



**Appendix Table 2**  
**Estimated cost of HCC risk biomarker test.**

| Multi-gene molecular test | National limit for clinical laboratory fee schedule gapfill |
|---------------------------|-------------------------------------------------------------|
| #1                        | \$795.95                                                    |
| #2                        | \$795.95                                                    |
| #3                        | \$597.31                                                    |
| #4                        | \$647.75                                                    |
| #5                        | \$3,416.00                                                  |
| #6                        | \$3,416.00                                                  |
| Median                    | \$795.95                                                    |

From 2015 national limits for Clinical Laboratory Fee Schedule gapfill pricing.  
HCC: hepatocellular carcinoma.

**Appendix Table 3**

**Subgroup analysis of cost-effectiveness of risk-stratified screening strategies within high-, intermediate- and low-risk groups.**

| Risk group   | Risk-stratified screening strategy | QALE | Cost     | ICER (vs US2×-100%) | ICER (vs US2×-15%) |
|--------------|------------------------------------|------|----------|---------------------|--------------------|
| Low          | US2×-100%                          | 7.01 | \$48,258 | -                   | -                  |
| Low          | US2×-15%                           | 6.95 | \$39,888 | -                   | -                  |
| Low          | US4×-US4×-none                     | 7.02 | \$38,812 | Dominant            | Dominant           |
| Low          | US4×-none-none                     | 7.02 | \$38,812 | Dominant            | Dominant           |
| Low          | US4×-US2×-none                     | 7.02 | \$38,812 | Dominant            | Dominant           |
| Low          | US4×-US2×-US2×                     | 7.01 | \$49,661 | Dominated           | \$162,886          |
| Low          | AMRI-AMRI-none                     | 7.02 | \$38,812 | Dominant            | Dominant           |
| Low          | AMRI-none-none                     | 7.02 | \$38,812 | Dominant            | Dominant           |
| Low          | AMRI-US2×-none                     | 7.02 | \$38,812 | Dominant            | Dominant           |
| Low          | AMRI-US2×-US2×                     | 7.01 | \$49,661 | Dominated           | \$162,886          |
| Low          | MRI-MRI-none                       | 7.02 | \$38,812 | Dominant            | Dominant           |
| Low          | MRI-none-none                      | 7.02 | \$38,812 | Dominant            | Dominant           |
| Low          | MRI-US2×-none                      | 7.02 | \$38,812 | Dominant            | Dominant           |
| Low          | MRI-US2×-US2×                      | 7.01 | \$49,661 | Dominated           | \$162,886          |
| Low          | US2×-none-none                     | 7.02 | \$38,812 | Dominant            | Dominant           |
| Low          | US2×-US2×-none                     | 7.02 | \$38,812 | Dominant            | Dominant           |
| Intermediate | US2×-100%                          | 6.48 | \$49,824 | -                   | -                  |
| Intermediate | US2×-15%                           | 6.38 | \$44,589 | -                   | -                  |
| Intermediate | US4×-US4×-none                     | 6.48 | \$59,696 | Dominated           | \$151,070          |
| Intermediate | US4×-none-none                     | 6.2  | \$45,324 | Less effective      | Less effective     |
| Intermediate | US4×-US2×-none                     | 6.48 | \$50,620 | Dominated           | \$60,309           |
| Intermediate | US4×-US2×-US2×                     | 6.48 | \$50,620 | Dominated           | \$60,309           |
| Intermediate | AMRI-AMRI-none                     | 6.51 | \$52,647 | \$94,107            | \$61,986           |
| Intermediate | AMRI-none-none                     | 6.2  | \$45,324 | Less effective      | Less effective     |
| Intermediate | AMRI-US2×-none                     | 6.48 | \$50,620 | Dominated           | \$60,309           |
| Intermediate | AMRI-US2×-US2×                     | 6.48 | \$50,620 | Dominated           | \$60,309           |
| Intermediate | MRI-MRI-none                       | 6.48 | \$56,364 | Dominated           | \$117,754          |
| Intermediate | MRI-none-none                      | 6.2  | \$45,324 | Less effective      | Less effective     |
| Intermediate | MRI-US2×-none                      | 6.48 | \$50,620 | Dominated           | \$60,309           |
| Intermediate | MRI-US2×-US2×                      | 6.48 | \$50,620 | Dominated           | \$60,309           |
| Intermediate | US2×-none-none                     | 6.2  | \$45,324 | Less effective      | Less effective     |
| Intermediate | US2×-US2×-none                     | 6.48 | \$50,620 | Dominated           | \$60,309           |
| High         | US2×-100%                          | 6.27 | \$54,942 | -                   | -                  |
| High         | US2×-15%                           | 6.04 | \$46,041 | -                   | -                  |
| High         | US4×-US4×-none                     | 6.27 | \$60,760 | Dominated           | \$63,998           |
| High         | US4×-none-none                     | 6.27 | \$60,760 | Dominated           | \$63,998           |
| High         | US4×-US2×-none                     | 6.27 | \$60,760 | Dominated           | \$63,998           |
| High         | US4×-US2×-US2×                     | 6.27 | \$60,760 | Dominated           | \$63,998           |
| High         | AMRI-AMRI-none                     | 6.28 | \$56,177 | \$123,509           | \$42,234           |
| High         | AMRI-none-none                     | 6.28 | \$56,177 | \$123,509           | \$42,234           |
| High         | AMRI-US2×-none                     | 6.28 | \$56,177 | \$123,509           | \$42,234           |
| High         | AMRI-US2×-US2×                     | 6.28 | \$56,177 | \$123,509           | \$42,234           |
| High         | MRI-MRI-none                       | 6.32 | \$58,920 | \$79,576            | \$45,999           |

|      |                |      |          |           |          |
|------|----------------|------|----------|-----------|----------|
| High | MRI-none-none  | 6.32 | \$58,920 | \$79,576  | \$45,999 |
| High | MRI-US2×-none  | 6.32 | \$58,920 | \$79,576  | \$45,999 |
| High | MRI-US2×-US2×  | 6.32 | \$58,920 | \$79,576  | \$45,999 |
| High | US2×-none-none | 6.27 | \$55,738 | Dominated | \$42,161 |
| High | US2×-US2×-none | 6.27 | \$55,738 | Dominated | \$42,161 |

2×, screening two times a year; 4×, screening four times a year; MRI and AMRI are biannual.

Dominant or ICER less than \$50,000 per QALY are highlighted in green.

US, ultrasound; MRI, magnetic resonance imaging; AMRI, abbreviated MRI;

QALE, quality adjusted life expectancy; ICER, incremental cost-effectiveness ratio.

**Appendix Table 4**

**Cost-effectiveness of HCC screening strategies tested using the EGF-based risk score.**

| <b>Risk group</b>                                                         | <b>QALE</b> | <b>Cost</b> | <b>ICER (vs. US2×-100%)</b> | <b>ICER (vs. US2×-15%)</b> |
|---------------------------------------------------------------------------|-------------|-------------|-----------------------------|----------------------------|
| No screening                                                              | 6.87        | \$40,285    |                             |                            |
| <b>Reference strategies</b>                                               |             |             |                             |                            |
| Regular US screening (100% adherence; US2×-100%)                          | 6.85        | \$48,568    | Reference                   |                            |
| Regular US screening (15% adherence; US2×-15%)                            | 6.855       | \$41,496    |                             | Reference                  |
| <b>Non-stratified experimental strategies</b>                             |             |             |                             |                            |
| MRI for all (MRI-100%)                                                    | 6.91        | \$54,043    | \$91,236                    | \$228,126                  |
| AMRI for all (AMRI-100%)                                                  | 6.86        | \$50,832    | \$226,389                   | \$1,867,328                |
| <b>Risk-stratified strategies (for high-intermediate-low risk groups)</b> |             |             |                             |                            |
| US4×-US2×-US2×                                                            | 6.85        | \$50,444    | Dominated                   | Dominated                  |
| MRI-US2×-US2×                                                             | 6.87        | \$50,384    | \$90,790                    | \$592,570                  |
| AMRI-US2×-US2×                                                            | 6.89        | \$49,995    | \$35,662                    | \$242,835                  |
| US2×-US2×-none                                                            | 6.91        | \$44,910    | Dominant                    | \$ 62,075                  |
| US4×-US4×-none                                                            | 6.89        | \$47,419    | Dominant                    | \$169,228                  |
| MRI-MRI-none                                                              | 6.93        | \$47,053    | Dominant                    | \$ 74,092                  |
| AMRI-AMRI-none                                                            | 6.93        | \$45,751    | Dominant                    | \$ 56,732                  |
| US4×-US2×-none                                                            | 6.91        | \$45,639    | Dominant                    | \$ 75,330                  |
| MRI-US2×-none                                                             | 6.92        | \$45,579    | Dominant                    | \$ 62,817                  |
| AMRI-US2×-none                                                            | 6.91        | \$45,189    | Dominant                    | \$ 67,159                  |
| US2×-none-none                                                            | 6.9         | \$42,377    | Dominant                    | \$ 19,592                  |
| US4×-none-none                                                            | 6.9         | \$43,106    | Dominant                    | \$ 35,792                  |
| MRI-none-none                                                             | 6.91        | \$43,046    | Dominant                    | \$ 28,192                  |
| AMRI-none-none                                                            | 6.91        | \$42,657    | Dominant                    | \$ 21,114                  |

2×, screening two times a year; 4×, screening four times a year; MRI and AMRI are biannual.

Dominant and cost-effective strategies (ICER <\$50,000) are in green.

US, ultrasound; MRI, magnetic resonance imaging; AMRI, abbreviated MRI;

QALE, quality adjusted life expectancy; ICER, incremental cost-effectiveness ratio.

## Appendix Table 5

Range and references for HCC incidence according to HCC etiology (Figure 2D main text).

| Etiology        | Range of HCC incidence | References |
|-----------------|------------------------|------------|
| HBV cirrhosis   | 3.0% - 8.0%            | (1)        |
| HCV cirrhosis   | 3.0% - 5.0%            | (1)        |
| HCV post SVR    | 0.3% - 1.4%            | (2, 3)     |
| ALD cirrhosis   | 0.2% - 2.6%            | (4-6)      |
| NAFLD cirrhosis | 0.3% - 2.3%            | (7-11)     |

ALD, alcoholic liver disease; HBV, hepatitis B virus; HCV, hepatitis C virus; NAFLD, nonalcoholic fatty liver disease; SVR, sustained virological response.

### References (for Appendix Table 5)

1. El-Serag HB. Hepatocellular carcinoma. *N Engl J Med* 2011;365:1118-27.
2. Li DK, Chung RT. Impact of hepatitis C virus eradication on hepatocellular carcinogenesis. *Cancer* 2015;121:2874-82.
3. El-Serag HB, Kanwal F, Richardson P, Kramer J. Risk of Hepatocellular Carcinoma after Sustained Virologic Response in Veterans with HCV-infection. *Hepatology* 2016.
4. Fattovich G, Stroffolini T, Zagni I, Donato F. Hepatocellular carcinoma in cirrhosis: incidence and risk factors. *Gastroenterology* 2004;127:S35-50.
5. Mancebo A, González-Diéguez ML, Cadahía V, Varela M, Pérez R, Navascués CA, et al. Annual Incidence of Hepatocellular Carcinoma Among Patients With Alcoholic Cirrhosis and Identification of Risk Groups. *Clinical Gastroenterology and Hepatology* 2013;11:95-101.
6. Jepsen P, Ott P, Andersen PK, Sørensen HT, Vilstrup H. Risk for hepatocellular carcinoma in patients with alcoholic cirrhosis: a Danish nationwide cohort study. *Annals of internal medicine* 2012;156:841-7.
7. Adams LA, Lymp JF, Sauver JS, Sanderson SO, Lindor KD, Feldstein A, et al. The natural history of nonalcoholic fatty liver disease: a population-based cohort study. *Gastroenterology* 2005;129:113-21.
8. Ekstedt M, Franzén LE, Mathiesen UL, Thorelius L, Holmqvist M, Bodemar G, et al. Long-term follow-up of patients with NAFLD and elevated liver enzymes. *Hepatology* 2006;44:865-73.
9. Hashimoto E, Yatsuji S, Tobari M, Taniai M, Torii N, Tokushige K, et al. Hepatocellular carcinoma in patients with nonalcoholic steatohepatitis. *Journal of gastroenterology* 2009;44:89-95.
10. Kawamura Y, Arase Y, Ikeda K, Seko Y, Imai N, Hosaka T, et al. Large-scale long-term follow-up study of Japanese patients with non-alcoholic fatty liver disease for the onset of hepatocellular carcinoma. *The American journal of gastroenterology* 2012;107:253-61.
11. Matteoni CA, Younossi ZM, Gramlich T, Boparai N, Liu YC, McCullough AJ. Nonalcoholic fatty liver disease: a spectrum of clinical and pathological severity. *Gastroenterology* 1999;116:1413-9.

**Appendix Table 6**  
**Model variables with references (Table 1 main text)**

| <b>Variable</b>                                                                       | <b>Baseline [range tested]</b> | <b>References</b> |
|---------------------------------------------------------------------------------------|--------------------------------|-------------------|
| <b>Disease progression</b>                                                            |                                |                   |
| Age (years)                                                                           | 50 [40-60]                     |                   |
| Cycle time                                                                            | 6 months                       |                   |
| <u>Compensated cirrhosis prognosis</u>                                                |                                |                   |
| Adjusted annual excess mortality of compensated cirrhosis                             | 4% [1.8%-8%]                   | (1)               |
| 10-year survival of compensated cirrhosis                                             | 64% [43%-80%]                  | (1)               |
| Annual probability of transition from compensated to decompensated cirrhosis          | 5% [3%-8%]                     | (1)               |
| <u>Decompensated cirrhosis prognosis</u>                                              |                                |                   |
| Annual mortality of decompensated cirrhosis                                           | 28% [18%-30%]                  | (1-3)             |
| 2-year survival of decompensated cirrhosis                                            | 52% [49%-67%]                  | (1-3)             |
| <u>HCC prognosis</u>                                                                  |                                |                   |
| Annual mortality of advanced HCC                                                      | 75% [30%-95%]                  | (4, 5)            |
| <u>HCC natural history</u>                                                            |                                |                   |
| Annual HCC probability                                                                | 2.9% [0.5%-7.0%]               | (6)               |
| Annual probability of progression from small to advanced HCC                          | 40% [20%-70%]                  | (7)               |
| <u>Probability of therapy</u>                                                         |                                |                   |
| Probability of HCC in compensated cirrhosis to be treated with surgical resection     | 40% [20%-60%]                  | (8, 9)            |
| Probability of liver transplantation for early HCC in compensated cirrhosis           | 20% [0-50%]                    | (8, 9)            |
| Probability of local ablation for HCC in decompensated cirrhosis                      | 40% [20-100%]                  | (8, 9)            |
| Probability of treatment of early HCC after identification in compensated cirrhosis   | 69% [50-100%]                  | (6, 10)           |
| Probability of treatment of early HCC after identification in decompensated cirrhosis | 30% [0-50%]                    | (11)              |

|                                                                                                  |                                                                                  |              |
|--------------------------------------------------------------------------------------------------|----------------------------------------------------------------------------------|--------------|
| Probability of liver transplantation for early HCC in treatment-eligible decompensated cirrhosis | 40% [0-80%]                                                                      | (11)         |
| Probability of local ablation for early HCC in treatment-eligible decompensated cirrhosis        | 60% [20-100%]                                                                    | (11)         |
| <b>Prognosis after therapy</b>                                                                   |                                                                                  |              |
| 5-year survival after hepatic resection for HCC                                                  | 44% [38%-51%]                                                                    | (12-15)      |
| Perioperative mortality of hepatic resection                                                     | 3.9% [3.7%-4.5%]                                                                 | (12, 16)     |
| 5-year survival after liver transplantation for HCC                                              | 70% [65%-80%]                                                                    | (12, 17-19)  |
| Perioperative mortality of liver transplantation                                                 | 4.3% [2.3%-6.3%]                                                                 | (18)         |
| 5-year survival after local ablation for HCC in compensated cirrhosis                            | 46% [32%-77%]                                                                    | (20, 21, 22) |
| 5-year survival after local ablation for HCC in decompensated cirrhosis                          | 31% [27%-40%]                                                                    | (20, 23)     |
| Perioperative mortality of local ablation                                                        | 0.3% [0-1.8%]                                                                    | (24)         |
| <b>HCC risk score</b>                                                                            |                                                                                  |              |
| 186-gene-based risk score, proportion of each risk group                                         | High: 36% [0-50%]<br>Intermediate: 37%<br>Low: 27% [10-50%]                      | (25)         |
| 186-gene-based risk score, annual HCC incidence in each risk group                               | High: 4.9% [0.8%-12%]<br>Intermediate: 3.3% [0.6%-8.0%]<br>Low: 0.8% [0.1%-1.9%] | (25)         |
| EGF genotype-based risk score, proportion of each risk group                                     | High: 14% [0-40%]<br>Intermediate: 29%<br>Low: 57% [0-60%]                       | (26)         |
| EGF genotype-based risk score, annual HCC incidence in each risk group                           | High: 5% [2.5%-10%]<br>Intermediate: 1.8% [0.9%-3.6%]<br>Low: 0.4% [0.2%-0.8%]   | (26)         |
| <b>Screening and diagnosis test characteristics</b>                                              |                                                                                  |              |
| Probability of being screened for HCC                                                            | 100% [15%-100%]                                                                  |              |
| Reported probability of being screened for HCC                                                   | 15% [5%-60%]                                                                     | (27-29)      |
| Probability of incidental early HCC in non-screened group                                        | 30% [0%-50%]                                                                     | (30)         |
| Ultrasound sensitivity for early-stage HCC screening                                             | 63% [35%-78%]                                                                    | (31, 32)     |

|                                                              |                                     |                                                           |
|--------------------------------------------------------------|-------------------------------------|-----------------------------------------------------------|
| Ultrasound specificity for early-stage HCC screening         | 91% [70%-95%]                       | (31, 33, 34)                                              |
| Screening full MRI sensitivity for early-stage HCC screening | 96% [80%-100%]                      | (35)                                                      |
| Screening full MRI specificity for early-stage HCC screening | 94% [85%-98%]                       | (35)                                                      |
| Abbreviated MRI sensitivity for early-stage HCC screening    | 83% [70%-95%]                       | (36)                                                      |
| Abbreviated MRI specificity for early-stage HCC screening    | 93% [86%-96%]                       | (36)                                                      |
| Diagnostic MRI sensitivity for early-stage HCC               | 88% [78%-92%]                       | (32, 33, 37-40)                                           |
| Diagnostic MRI specificity for early-stage HCC               | 94% [85%-98%]                       | (32, 33, 37-39)                                           |
| HCC biopsy sensitivity                                       | 62% [50%-100%]                      | (41)                                                      |
| HCC biopsy specificity                                       | 100% [80%-100%]                     | (11)                                                      |
| <b>Costs (\$)</b>                                            | Medicare, National Inpatient Sample | (10, 42, 43)                                              |
| Annual cost of compensated cirrhosis                         | 1,220 [610-2,440]                   |                                                           |
| Annual cost of decompensated cirrhosis                       | 15,000 [7,500-30,000]               |                                                           |
| Annual cost after liver transplantation                      | 14,600 [7,300-29,200]               |                                                           |
| Annual cost of advanced HCC                                  | 41,320 [20,660-82,640]              |                                                           |
| Cost of hepatic resection                                    | 42,540 [21,270-85,080]              |                                                           |
| Cost of liver transplantation                                | 177,000 [88,500-354,000]            |                                                           |
| Cost of local ablation                                       | 3,650 [1,825-7,300]                 |                                                           |
| Cost of imaging-guided HCC biopsy                            | 750 [375-1,500]                     |                                                           |
| Cost of ultrasound                                           | 143 [71-285]                        | Medicare (CPT 76700)                                      |
| Cost of screening full MRI                                   | 528 [264-1,056]                     | Medicare (standard MRI, CPT 74182)                        |
| Cost of screening abbreviated MRI                            | 313 [156-626]                       | Medicare (standard MRI, CPT 74182, technical cost halved) |
| Cost of diagnostic MRI                                       | 528 [264-528]                       | Medicare (standard MRI, CPT 74182)                        |
| Cost of risk score                                           | 796 [500-4,000]                     | Median of multi-gene gapfill CPT codes Medicare 2015      |



|                                     |                |              |
|-------------------------------------|----------------|--------------|
| Rate of discounting costs           | 3%             |              |
| <b>Quality-of-life weights</b>      |                | (10, 43, 44) |
| Utility of compensated cirrhosis    | 0.8 [0.6-1.0]  |              |
| Utility of decompensated cirrhosis  | 0.65 [0.5-0.8] |              |
| Utility after HCC diagnosis         | 0.3 [0.1-0.4]  |              |
| Utility after liver transplantation | 0.73 [0.5-0.8] |              |

AMRI, abbreviated MRI; CPT, current procedural terminology; EGF, epidermal growth factor; HCC, hepatocellular carcinoma; MRI, magnetic resonance imaging.

### References (for Appendix Table 6)

1. D'Amico G, Garcia-Tsao G, Pagliaro L. Natural history and prognostic indicators of survival in cirrhosis: a systematic review of 118 studies. *J Hepatol* 2006;44:217-31.
2. D'amico G, Morabito A, Pagliaro L, Marubini E. Survival and prognostic indicators in compensated and decompensated cirrhosis. *Digestive diseases and sciences* 1986;31:468-75.
3. Salerno F, Borroni G, Moser P, Badalamenti S, Cassarà L, Maggi A, et al. Survival and prognostic factors of cirrhotic patients with ascites: a study of 134 outpatients. *The American journal of gastroenterology* 1993;88:514-9.
4. Simonetti R, Liberati A, Angiolini C, Pagliaro L. Treatment of hepatocellular carcinoma: a systematic review of randomized controlled trials. *Annals of Oncology* 1997;8:117-36.
5. Nowak AK, Chow PK, Findlay M. Systemic therapy for advanced hepatocellular carcinoma: a review. *European Journal of Cancer* 2004;40:1474-84.
6. Tan D, Yopp A, Beg M, Gopal P, Singal A. Meta-analysis: underutilisation and disparities of treatment among patients with hepatocellular carcinoma in the United States. *Alimentary pharmacology & therapeutics* 2013;38:703-12.
7. Taouli B, Goh JS, Lu Y, Qayyum A, Yeh BM, Merriman RB, et al. Growth rate of hepatocellular carcinoma: evaluation with serial computed tomography or magnetic resonance imaging. *Journal of computer assisted tomography* 2005;29:425-9.
8. El-Serag HB, Siegel AB, Davila JA, Shaib YH, Cayton-Woody M, McBride R, et al. Treatment and outcomes of treating of hepatocellular carcinoma among Medicare recipients in the United States: a population-based study. *J Hepatol* 2006;44:158-66.
9. Kanwal F, Befeler A, Chari RS, Marrero J, Kahn J, Afdhal N, et al. Potentially curative treatment in patients with hepatocellular cancer--results from the liver cancer research network. *Aliment Pharmacol Ther* 2012;36:257-65.
10. Younossi ZM, Singer ME, McHutchison JG, Shermock KM. Cost effectiveness of interferon alpha2b combined with ribavirin for the treatment of chronic hepatitis C. *Hepatology* 1999;30:1318-24.
11. Andersson KL, Salomon JA, Goldie SJ, Chung RT. Cost effectiveness of alternative surveillance strategies for hepatocellular carcinoma in patients with cirrhosis. *Clin Gastroenterol Hepatol* 2008;6:1418-24.
12. Llovet JM, Fuster J, Bruix J. Intention-to-treat analysis of surgical treatment for early hepatocellular carcinoma: Resection versus transplantation. *Hepatology* 1999;30:1434-40.
13. Fong Y, Sun RL, Jarnagin W, Blumgart LH. An analysis of 412 cases of hepatocellular carcinoma at a Western center. *Annals of surgery* 1999;229:790.
14. Poon RT-P, Fan ST, Lo CM, Liu CL, Wong J. Long-term survival and pattern of recurrence after resection of small hepatocellular carcinoma in patients with preserved liver function: implications for a strategy of salvage transplantation. *Annals of surgery* 2002;235:373.
15. Franco D, Capussotti L, Smadja C, Bouzari H, Meakins J, Kemeny F, et al. Resection of hepatocellular carcinomas. *Gastroenterology* 1990;98:733-8.

16. Dhir M, Lyden ER, Smith LM, Are C. Comparison of outcomes of transplantation and resection in patients with early hepatocellular carcinoma: a meta-analysis. *HPB : the official journal of the International Hepato Pancreato Biliary Association* 2012;14:635-45.
17. Lim KC, Chow PH, Allen J, Siddiqui F, Chan EY, Tan SB. Systematic review of outcomes of liver resection for early hepatocellular carcinoma within the Milan criteria. *British Journal of Surgery* 2012;99:1622-9.
18. Yao FY, Ferrell L, Bass NM, Watson JJ, Bacchetti P, Venook A, et al. Liver transplantation for hepatocellular carcinoma: expansion of the tumor size limits does not adversely impact survival. *Hepatology* 2001;33:1394-403.
19. Mazzaferro V, Regalia E, Doci R, Andreola S, Pulvirenti A, Bozzetti F, et al. Liver transplantation for the treatment of small hepatocellular carcinomas in patients with cirrhosis. *N Engl J Med* 1996;334:693-9.
20. Lencioni R, Cioni D, Crocetti L, Franchini C, Pina CD, Lera J, et al. Early-stage hepatocellular carcinoma in patients with cirrhosis: long-term results of percutaneous image-guided radiofrequency ablation. *Radiology* 2005;234:961-7.
21. Shiina S, Tateishi R, Arano T, Uchino K, Enooku K, Nakagawa H, et al. Radiofrequency ablation for hepatocellular carcinoma: 10-year outcome and prognostic factors. *Am J Gastroenterol* 2012;107:569-77; quiz 78.
22. Tiong L, Maddern G. Systematic review and meta-analysis of survival and disease recurrence after radiofrequency ablation for hepatocellular carcinoma. *British Journal of Surgery* 2011;98:1210-24.
23. Tateishi R, Shiina S, Teratani T, Obi S, Sato S, Koike Y, et al. Percutaneous radiofrequency ablation for hepatocellular carcinoma. *Cancer* 2005;103:1201-9.
24. Livraghi T, Solbiati L, Meloni MF, Gazelle GS, Halpern EF, Goldberg SN. Treatment of focal liver tumors with percutaneous radio-frequency ablation: complications encountered in a multicenter study. *Radiology* 2003;226:441-51.
25. King LY, Canasto-Chibuque C, Johnson KB, Yip S, Chen X, Kojima K, et al. A genomic and clinical prognostic index for hepatitis C-related early-stage cirrhosis that predicts clinical deterioration. *Gut* 2015;64:1296-302.
26. Abu Dayyeh BK, Yang M, Fuchs BC, Karl DL, Yamada S, Sninsky JJ, et al. A functional polymorphism in the epidermal growth factor gene is associated with risk for hepatocellular carcinoma. *Gastroenterology* 2011;141:141-9.
27. Davila JA, Henderson L, Kramer JR, Kanwal F, Richardson PA, Duan Z, et al. Utilization of surveillance for hepatocellular carcinoma among hepatitis C virus-infected veterans in the United States. *Ann Intern Med* 2011;154:85-93.
28. Singal AG, Yopp A, Skinner CS, Packer M, Lee WM, Tiro JA. Utilization of hepatocellular carcinoma surveillance among American patients: a systematic review. *Journal of general internal medicine* 2012;27:861-7.
29. Singal AG, Li X, Tiro J, Kandunoori P, Adams-Huet B, Nehra MS, et al. Racial, social, and clinical determinants of hepatocellular carcinoma surveillance. *The American journal of medicine* 2015;128:90. e1-. e7.
30. Singal AG, Pillai A, Tiro J. Early detection, curative treatment, and survival rates for hepatocellular carcinoma surveillance in patients with cirrhosis: a meta-analysis. *PLoS Med* 2014;11:e1001624.
31. Singal A, Volk ML, Waljee A, Salgia R, Higgins P, Rogers MA, et al. Meta-analysis: surveillance with ultrasound for early-stage hepatocellular carcinoma in patients with cirrhosis. *Aliment Pharmacol Ther* 2009;30:37-47.
32. Chou R, Cuevas C, Fu R, Devine B, Wasson N, Ginsburg A, et al. Imaging techniques for the diagnosis of hepatocellular carcinoma: a systematic review and meta-analysis. *Annals of internal medicine* 2015;162:697-711.
33. Colli A, Fraquelli M, Casazza G, Massironi S, Colucci A, Conte D, et al. Accuracy of ultrasonography, spiral CT, magnetic resonance, and alpha-fetoprotein in diagnosing hepatocellular carcinoma: a systematic review. *Am J Gastroenterol* 2006;101:513-23.

34. Yu NC, Chaudhari V, Raman SS, Lassman C, Tong MJ, Busuttil RW, et al. CT and MRI improve detection of hepatocellular carcinoma, compared with ultrasound alone, in patients with cirrhosis. *Clin Gastroenterol Hepatol* 2011;9:161-7.
35. Lim Y, Kim S, Byun JH, Won HJ, Lee SJ, Han S, et al. Surveillance for Hepatocellular Carcinoma with Magnetic Resonance Imaging Using a Liver-Specific Contrast Agent Gadoteric Acid and Ultrasonography in High-Risk Patients with Cirrhosis. *Hepatology* 2014;AASLD 2014: abstract 1338.
36. Marks RM, Ryan A, Heba ER, Tang A, Wolfson TJ, Gamst AC, et al. Diagnostic Per-Patient Accuracy of an Abbreviated Hepatobiliary Phase Gadoteric Acid-Enhanced MRI for Hepatocellular Carcinoma Surveillance. *American Journal of Roentgenology* 2015;204:527-35.
37. Leoni S, Piscaglia F, Golfieri R, Camaggi V, Vidili G, Pini P, et al. The impact of vascular and nonvascular findings on the noninvasive diagnosis of small hepatocellular carcinoma based on the EASL and AASLD criteria. *Am J Gastroenterol* 2010;105:599-609.
38. Sangiovanni A, Manini MA, Iavarone M, Romeo R, Forzenigo LV, Fraquelli M, et al. The diagnostic and economic impact of contrast imaging techniques in the diagnosis of small hepatocellular carcinoma in cirrhosis. *Gut* 2010;59:638-44.
39. Lee YJ, Lee JM, Lee JS, Lee HY, Park BH, Kim YH, et al. Hepatocellular carcinoma: diagnostic performance of multidetector CT and MR imaging—a systematic review and meta-analysis. *Radiology* 2015;275:97-109.
40. Hanna RF, Miloushev VZ, Tang A, Finklestone LA, Brejt SZ, Sandhu RS, et al. Comparative 13-year meta-analysis of the sensitivity and positive predictive value of ultrasound, CT, and MRI for detecting hepatocellular carcinoma. *Abdominal Radiology* 2015:1-20.
41. Forner A, Vilana R, Ayuso C, Bianchi L, Sole M, Ayuso JR, et al. Diagnosis of hepatic nodules 20 mm or smaller in cirrhosis: Prospective validation of the noninvasive diagnostic criteria for hepatocellular carcinoma. *Hepatology* 2008;47:97-104.
42. Sarasin FP, Giostra E, Hadengue A. Cost-effectiveness of screening for detection of small hepatocellular carcinoma in western patients with Child-Pugh class A cirrhosis. *The American journal of medicine* 1996;101:422-34.
43. Bennett WG, Inoue Y, Beck JR, Wong JB, Pauker SG, Davis GL. Estimates of the cost-effectiveness of a single course of interferon- $\alpha$ 2b in patients with histologically mild chronic hepatitis C. *Annals of internal medicine* 1997;127:855-65.
44. Kim WR, Poterucha JJ, Hermans JE, Therneau TM, Dickson ER, Evans RW, et al. Cost-effectiveness of 6 and 12 months of interferon- $\alpha$  therapy for chronic hepatitis C. *Annals of internal medicine* 1997;127:866-74.

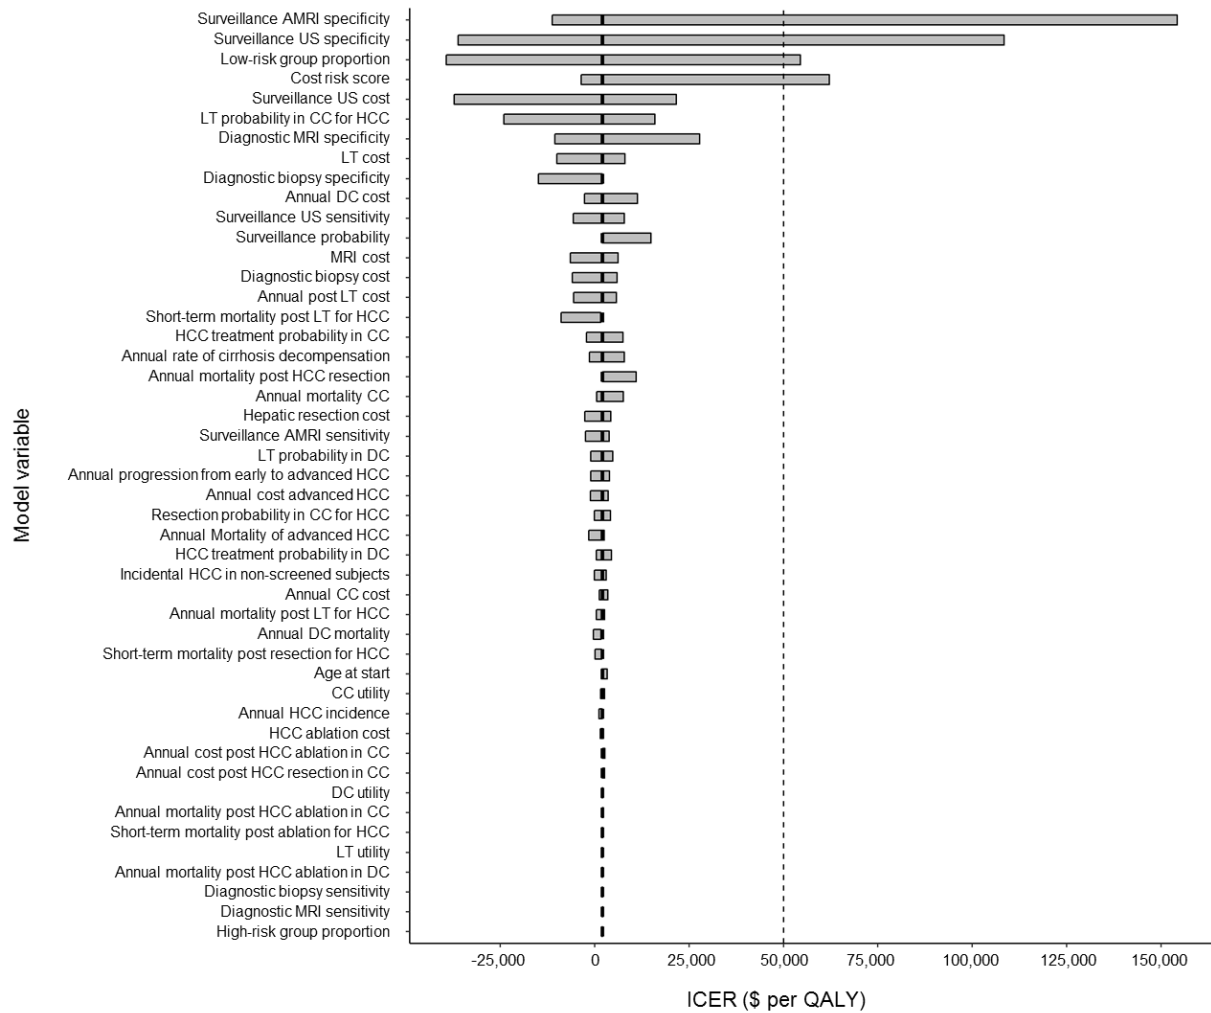

**Appendix Figure 1**

**Tornado plot for AMRI-AMRI-none compared to US2x-100%.**

The effect of varying all model parameters on the ICER of AMRI-AMRI-none compared to US2x-100% was assessed. The dashed line indicates an ICER of \$50,000 per QALY as the threshold of cost-effectiveness.

AMRI, abbreviated MRI; CC, compensated cirrhosis; DC, decompensated cirrhosis; LT, liver transplantation; MRI, magnetic resonance imaging; US, ultrasound.

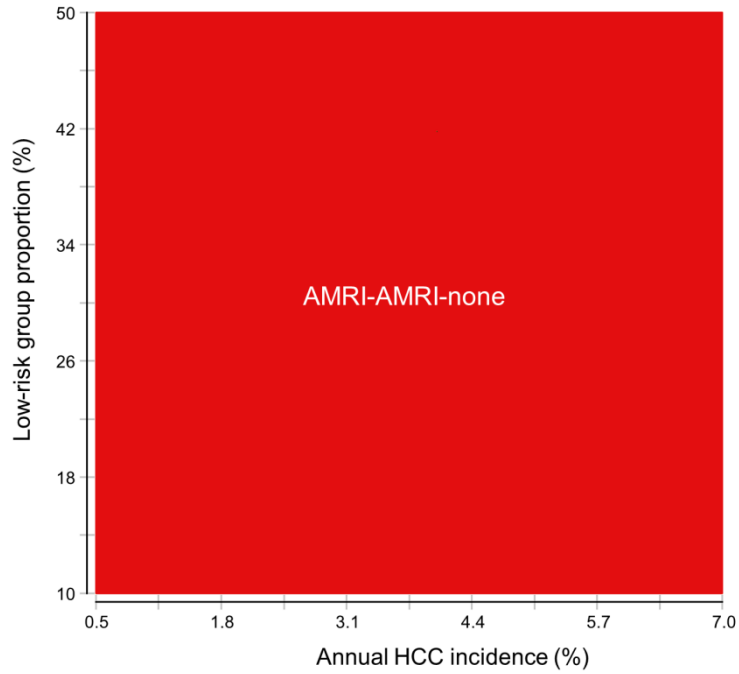

**Appendix Figure 2**

**Two-way sensitivity analysis of annual HCC incidence vs. HCC low-risk group proportion.**

Overall HCC incidence was varied along with HCC low-risk group proportion to identify the best risk-stratified HCC screening strategy over the ranges of variables.

HCC, hepatocellular carcinoma; AMRI, abbreviated magnetic resonance imaging.

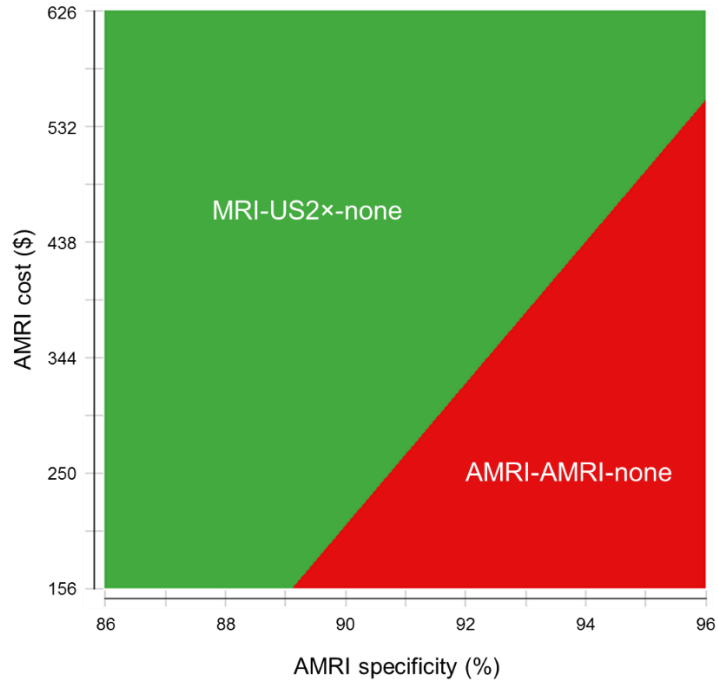

**Appendix Figure 3**

**Two-way sensitivity analysis of AMRI specificity vs. AMRI cost.**

AMRI cost and specificity were varied to identify the best risk-stratified HCC screening strategy over the ranges of variables.

AMRI, abbreviated magnetic resonance imaging; US, ultrasound.
